# Supplementary material
Source: PubMed Central journal article supplement (PMC3093132)

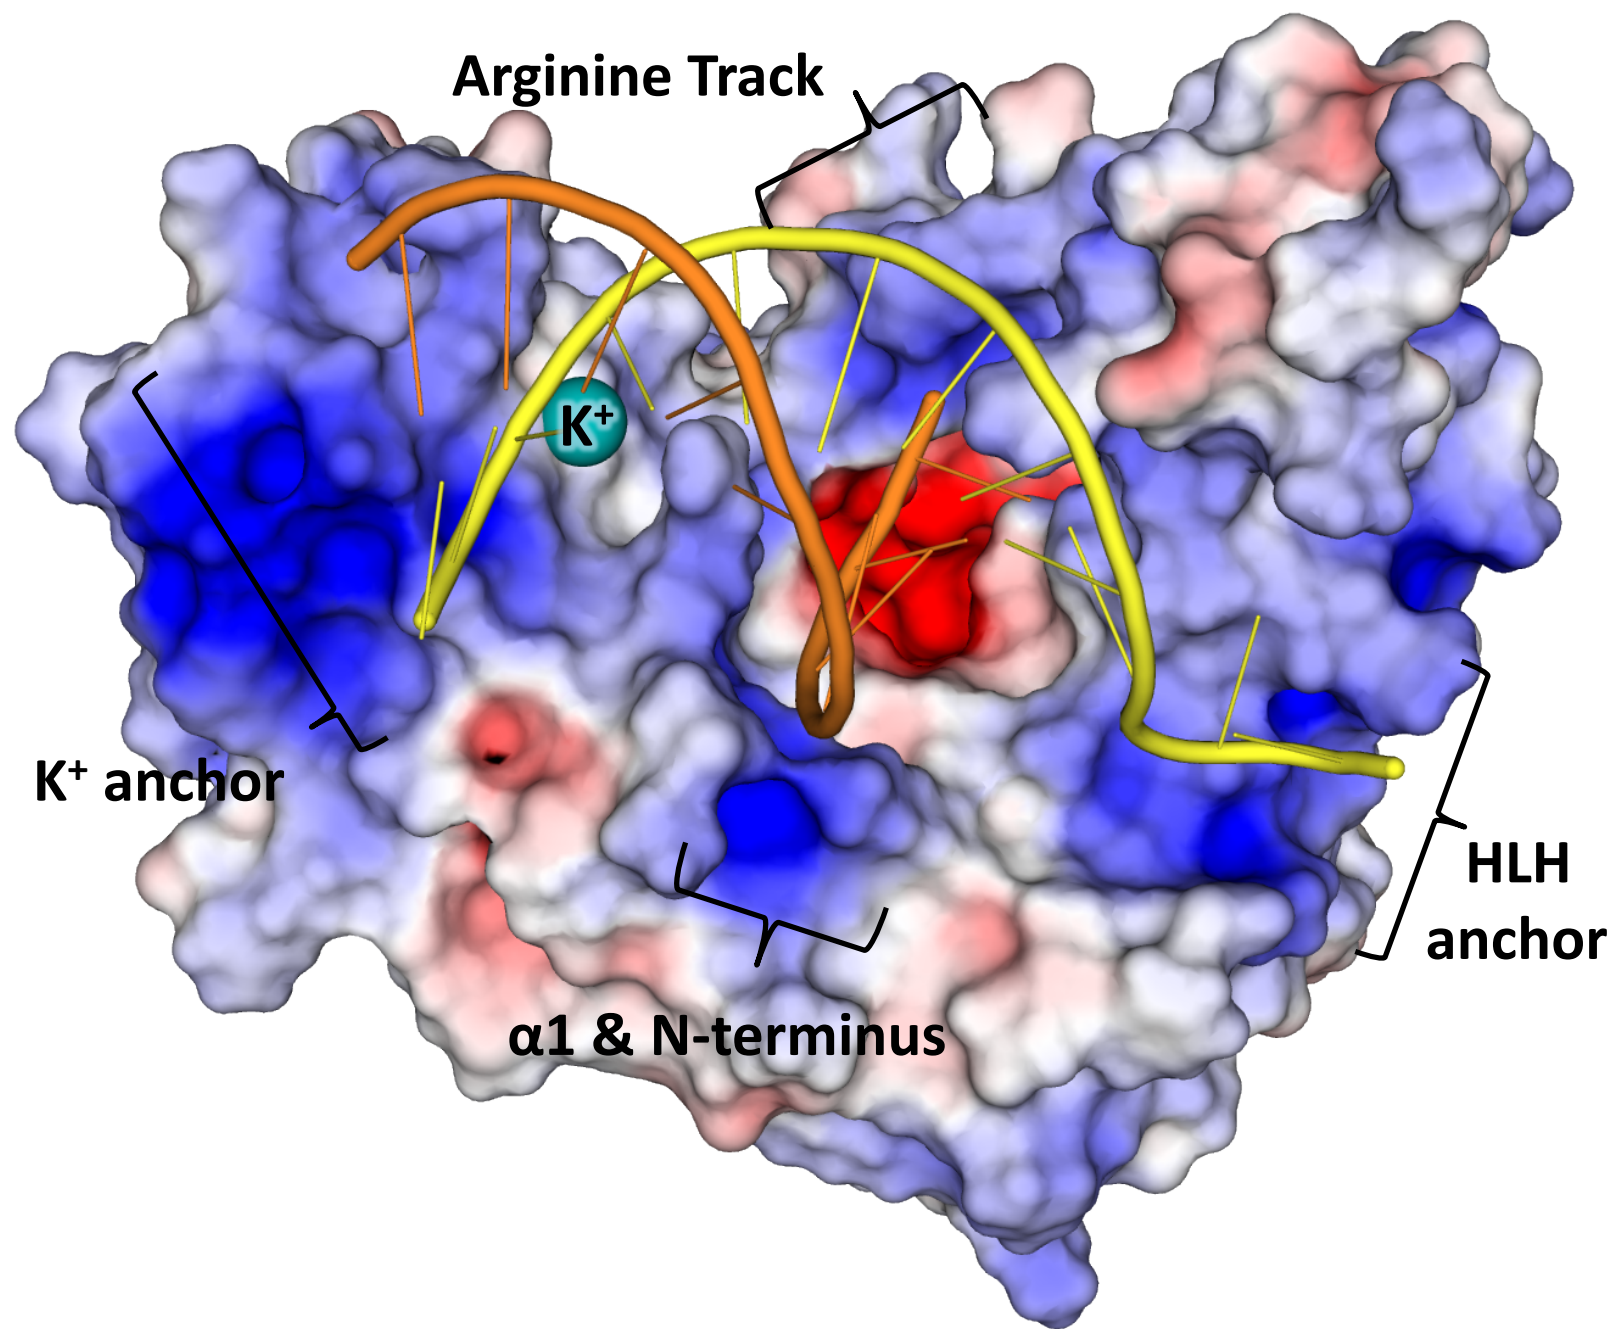

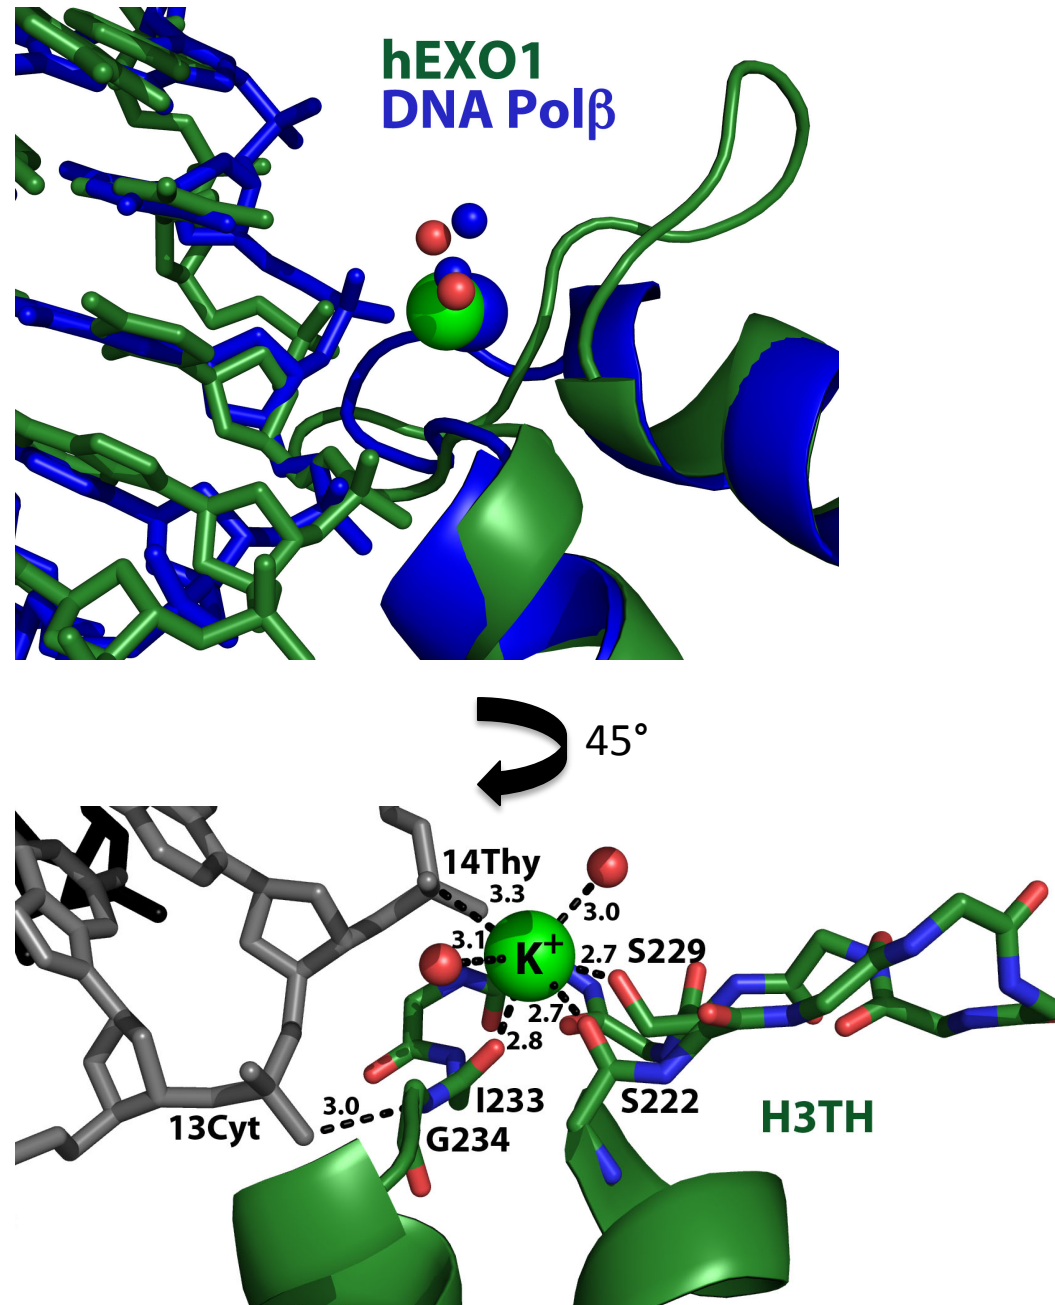

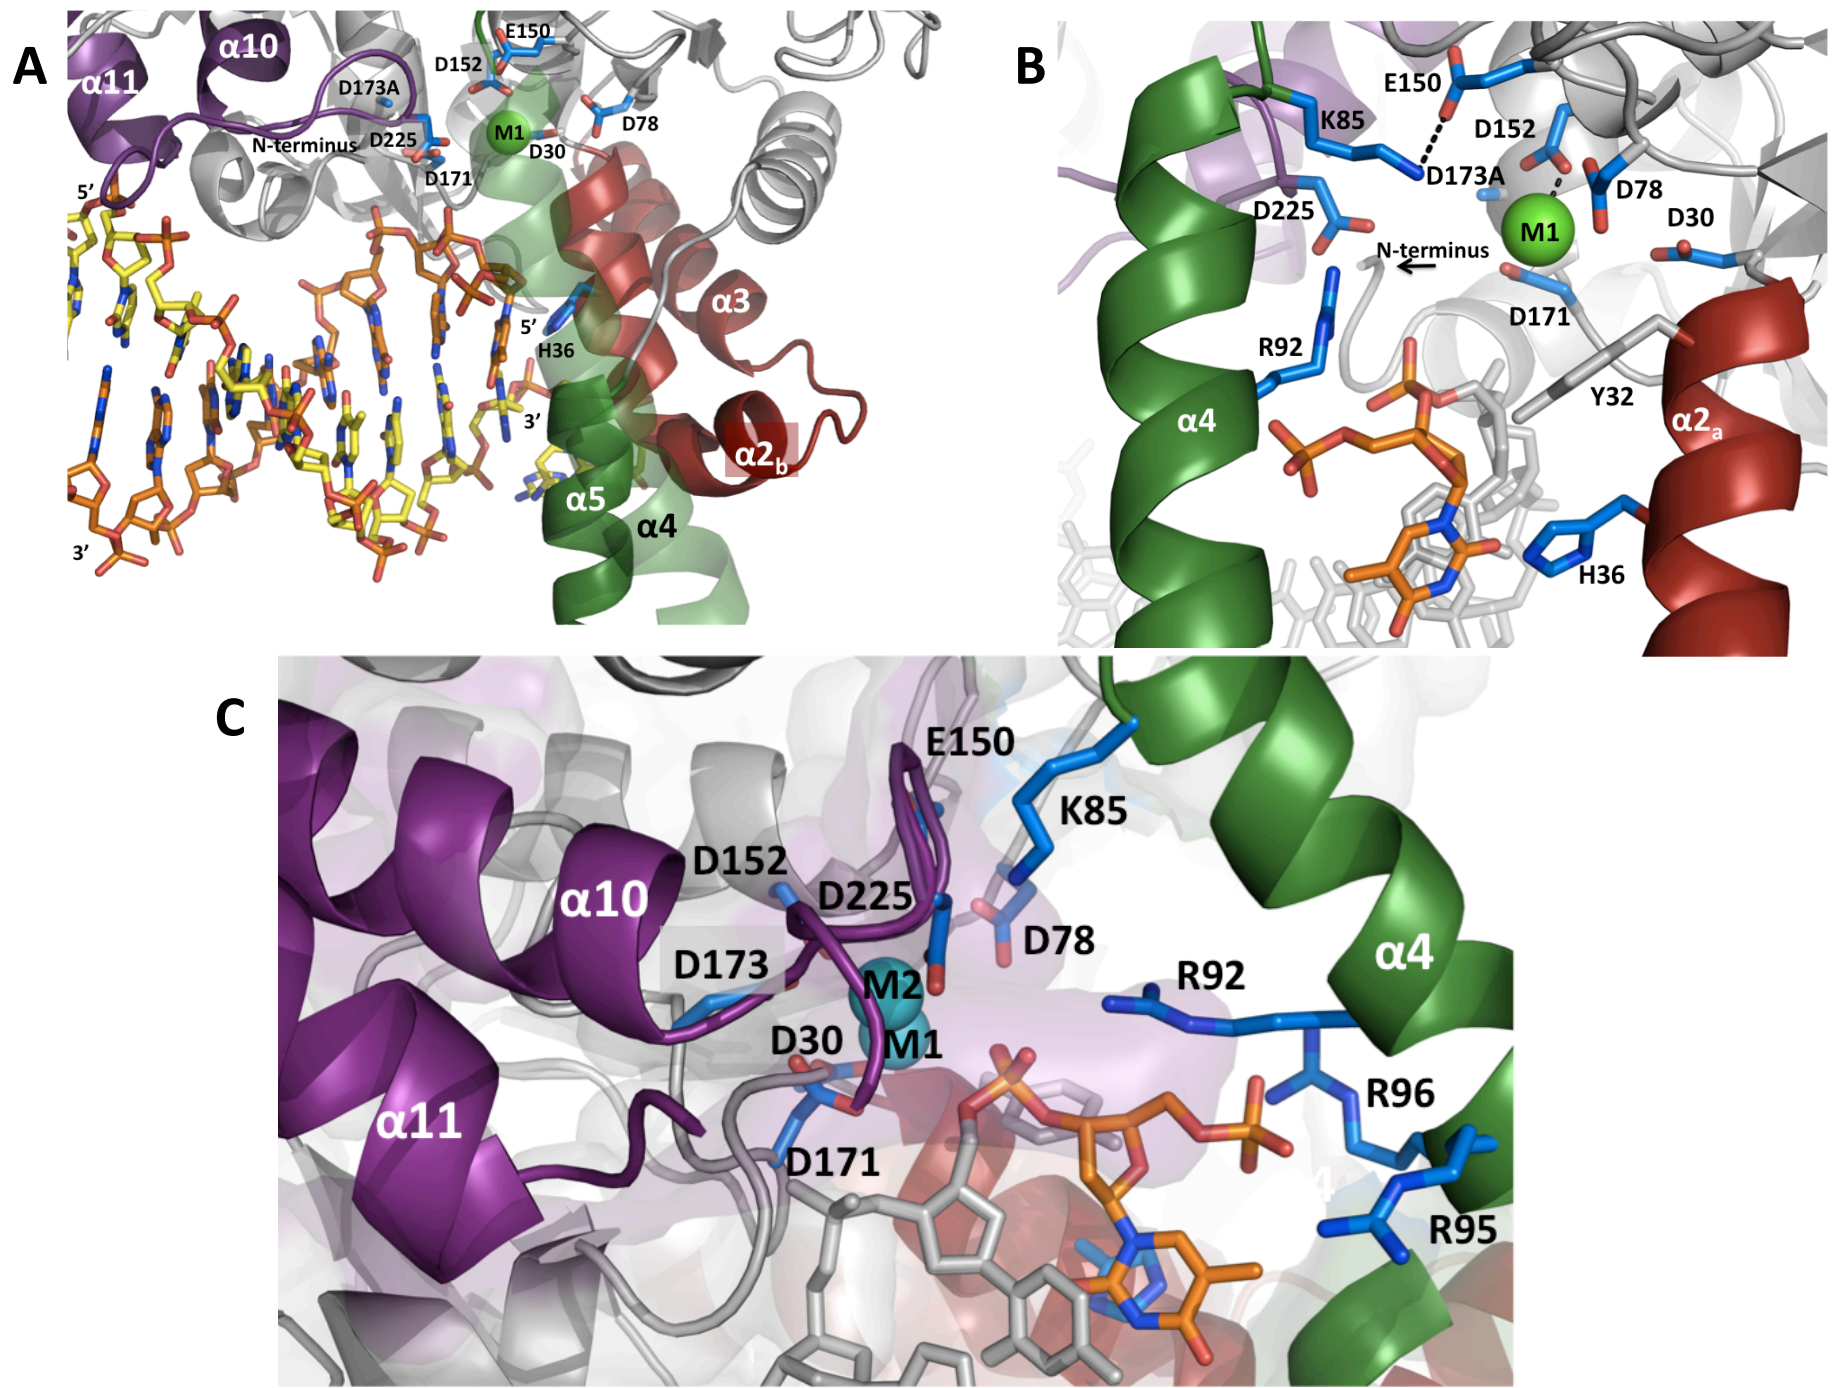

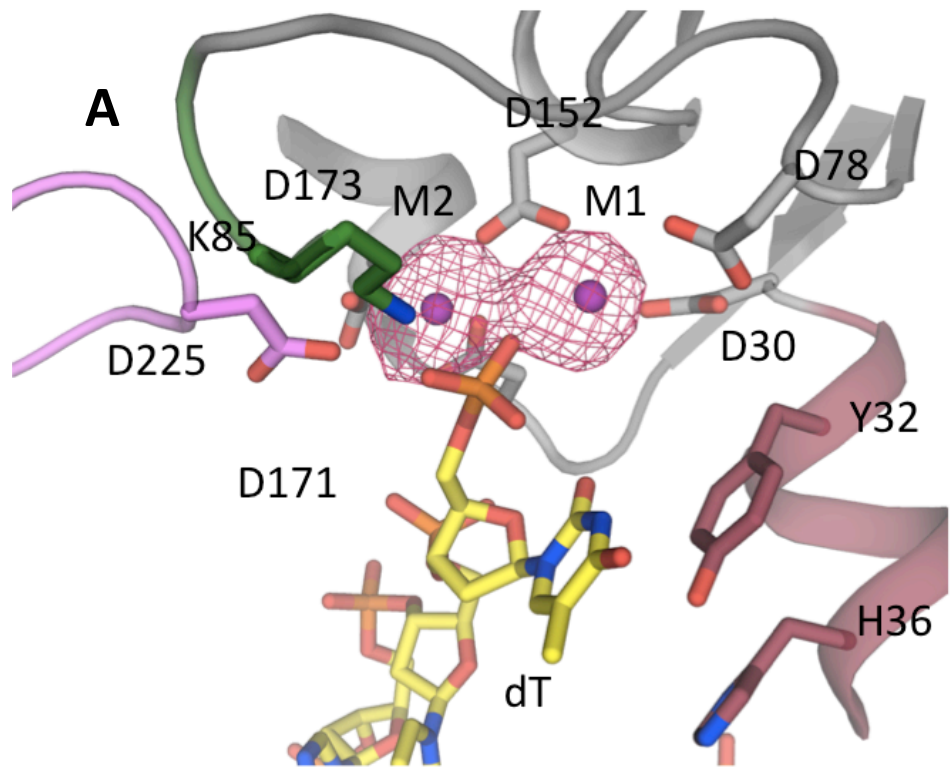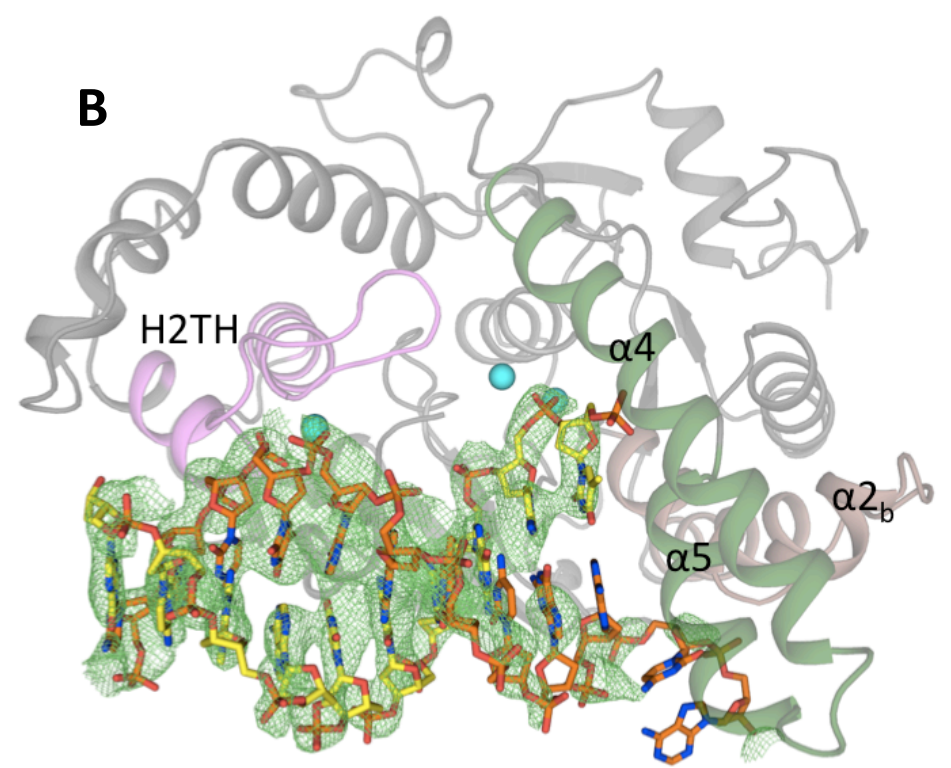

**A**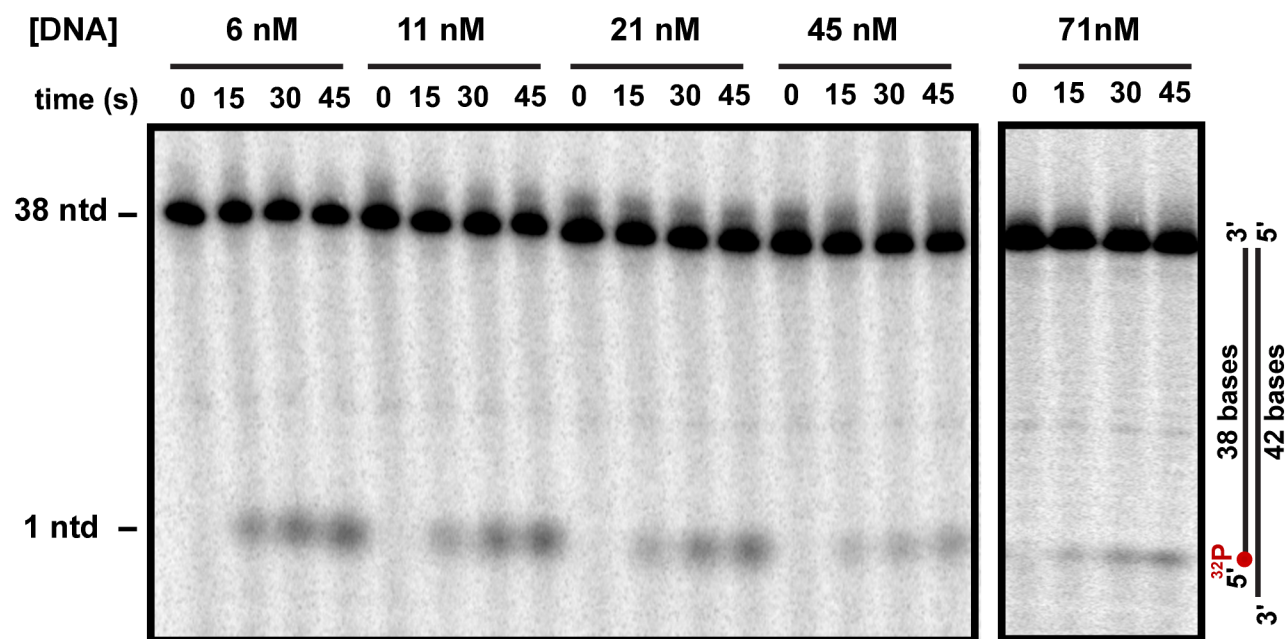**B**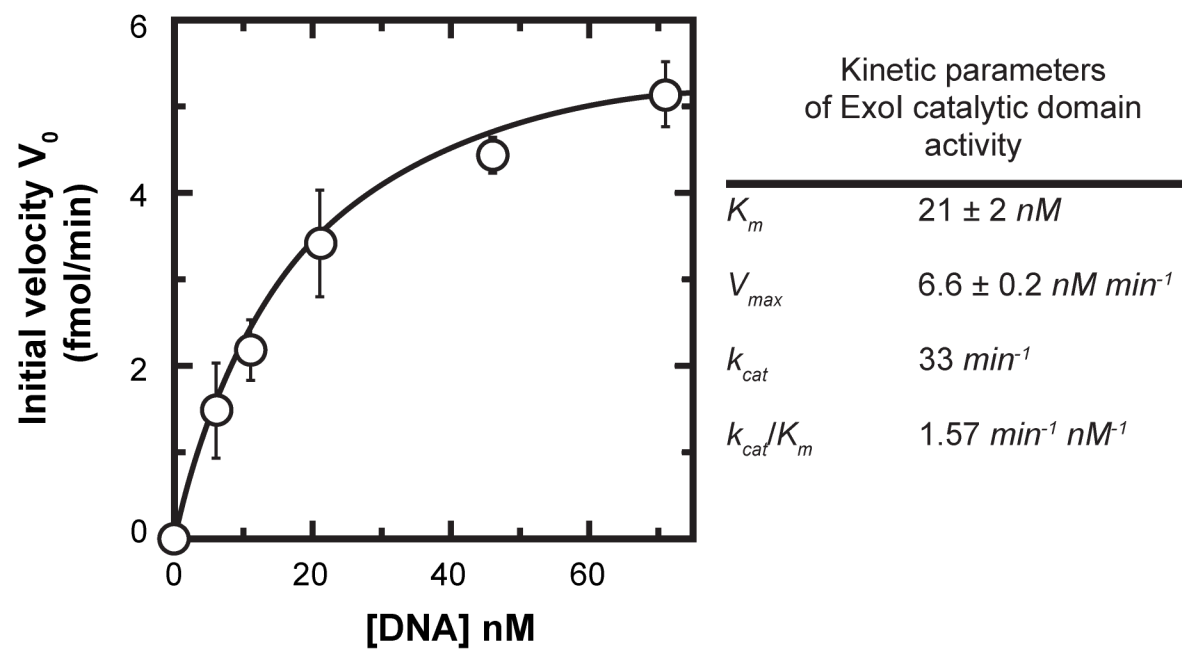**C**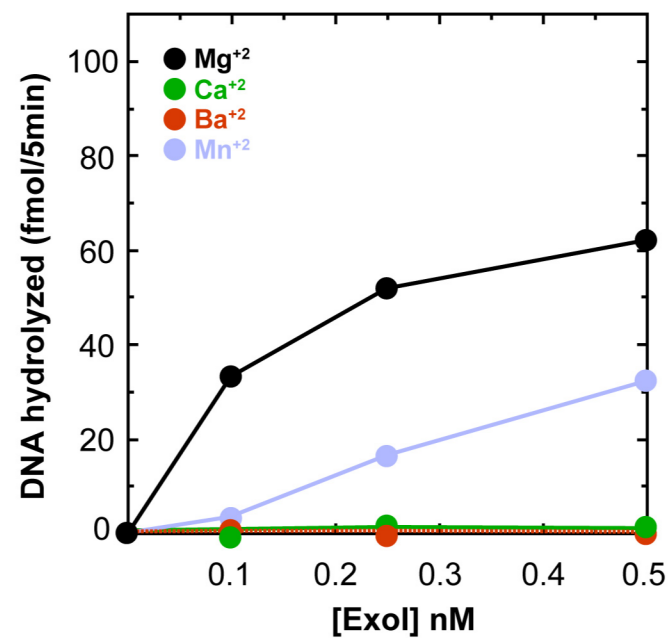

Supplement: NIHMS287798-supplement-02.pdf [file NIHMS287798-supplement-02.pdf]
